# Supplementary material for: Multi-scale spiking network model of human cerebral cortex
Source: PubMed Central journal article supplement (PMC11491286; doi:10.1093/cercor/bhae409), 2024-10-18
Supplement: humanmultiscalemodel_appendix_suppl_bhae409.pdf [file humanmultiscalemodel_appendix_suppl_bhae409.pdf]

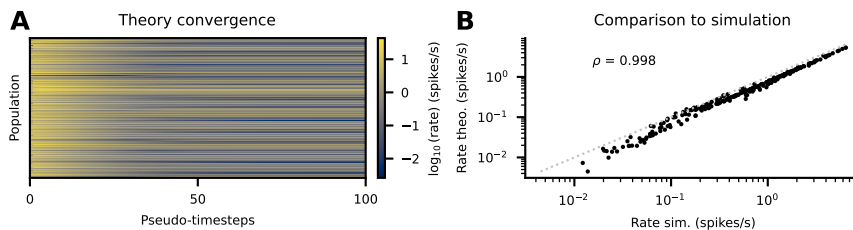

**Fig. S1.** Mean-field theory. **(A)** Firing rates of all populations across the pseudo-timesteps used to find a self-consistent solution. **(B)** Comparison of rates predicted by mean-field theory with empirical rates from a simulation.

## Appendix

### Mean-Field Theory

While developing the model, it was often beneficial to have a prediction of the activity without performing a computationally demanding full-scale simulation. To this end, we employed the mean-field theory developed by Amit, Brunel (1997) in combination with the extension to exponential postsynaptic currents derived by Fourcaud, Brunel (2002). Within this theory, the input to a neuron in population  $A$  is approximated as a Gaussian white noise with mean  $\mu_A$  and noise intensity  $\sigma_A^2$ . The main assumptions of this theory are that the inputs are uncorrelated, that the temporal structure of the input can be neglected, that a Gaussian approximation of its statistics is valid, that the delays can be neglected, and that the variability of the neuron parameters and synaptic weights can be neglected.

Despite the simplifying assumptions, the theory provides a reliable prediction of the average firing rates if the network is in an asynchronous irregular state (Fig. S1). The remaining deviations are likely a consequence of the neglected variabilities. Thus, the theory allows for rapid prototyping without the need for high-performance computing resources. However, note that the theory does not capture the model activity well for the best-fit version of the model, as the Gaussian white noise assumption does not apply there. Thus, the simulations are the only way to determine the model activity in that case.

### Sanity Checks

As sanity checks regarding the influence of the inferred connectivity, we discuss three controls: (1) Removing both long-range and intra-area connections from the model, (2) removing the intra-areal connectivity, and (3) removing all long-range projections from the model. In all three cases, we keep the external drive and remove only the model-internal synapses. The control (1) reduces to a set of isolated neurons in the mean-driven regime, see Sec. “Further Model Specifications”. Adding the inter-areal ones—which are all excitatory—for control (2) results in divergent activity due to excitatory loops. Control (3) corresponds to the case of  $\chi = 0$  in Fig. 5 with the activity shown in Suppl. Fig. S8 to S10. The network activity pattern is similar to that observed in the base version, Fig. 4, but with a lower firing rate. Thus, all aspects of the connectivity strongly influence the dynamics.

### Supplemental Tables

### Supplemental Figures

**Table S1.** Summary of data sources used in the model construction and comparative analysis

| Data modality                                                                                                                                                     | Sources                                                                                              |
|-------------------------------------------------------------------------------------------------------------------------------------------------------------------|------------------------------------------------------------------------------------------------------|
| Layer-resolved neuronal volume densities and layer thicknesses                                                                                                    | Von Economo (2009)                                                                                   |
| Mapping areas from von Economo and Koskinas parcellation to Desikan-Killiany                                                                                      | Goulas et al. (2016)                                                                                 |
| Layer-resolved relative size of excitatory and inhibitory populations from electron-microscopy based reconstruction of cortical tissue in the human temporal lobe | Shapson-Coe et al. (2024)                                                                            |
| Volume density of synapses                                                                                                                                        | Cano-Astorga et al. (2021)                                                                           |
| Fraction of local connections                                                                                                                                     | Herculano-Houzel et al. (2010); Herculano-Houzel (2009); Markov et al. (2011); Collins et al. (2010) |
| Decay constant for local spatial connection probability                                                                                                           | Packer, Yuste (2011); Perin et al. (2011)                                                            |
| Relative indegrees for local microcircuit connectivity                                                                                                            | Potjans, Diesmann (2014)                                                                             |
| Processed DTI data to define area-level long-range connectivity                                                                                                   | Goulas et al. (2016), which is based on Van Essen et al. (2013)                                      |
| Fraction of supragranular labeled neurons                                                                                                                         | Schmidt et al. (2018), which is based on data from Markov et al. (2014a)                             |
| Anterograde tracing from non-human primates                                                                                                                       | Schmidt et al. (2018), which is based on the CoCoMac database (Stephan et al., 2001)                 |
| Probability of a long-range postsynaptic target neuron being excitatory or inhibitory                                                                             | Schmidt et al. (2018), which is based on the data by Binzegger et al. (2004)                         |
| Layer-resolved soma position of targeted excitatory neurons for long-range connections                                                                            | Mohan et al. (2015, 2023)                                                                            |
| Neuron model parameters                                                                                                                                           | Teeter et al. (2018); Berg et al. (2021)                                                             |
| Average delay for long-range inter-areal connections                                                                                                              | Conduction velocity from Girard et al. (2001); fiber length from Goulas et al. (2016)                |
| Spiking data from medial frontal cortex used to validate spontaneous firing activity                                                                              | Minxha et al. (2020)                                                                                 |
| Magnetic resonance imaging data used to compare the functional connectivity matrices                                                                              | Original data as described in Subsection 2.2.3                                                       |

**Table S2.** Heuristics used for model construction, with consideration of possible extensions (Part 1)

| Feature            | Heuristic                                                                                                                                                       | Argument                                                                                                                                                                                                                                            | Starting points for extensions                                                                                                                                                                                            |
|--------------------|-----------------------------------------------------------------------------------------------------------------------------------------------------------------|-----------------------------------------------------------------------------------------------------------------------------------------------------------------------------------------------------------------------------------------------------|---------------------------------------------------------------------------------------------------------------------------------------------------------------------------------------------------------------------------|
| Neuron classes     | Neurons are divided into only two classes: one excitatory and one inhibitory.                                                                                   | This simplification is due to the lack of fine-grained connectivity data for neuron subtypes.                                                                                                                                                       | Diverse human cell types are reported (Berg et al., 2021; Hodge et al., 2019; Miller et al., 2019) and could be taken into account.                                                                                       |
| Synapses           | The volume density of synapses is approximated as constant across areas.                                                                                        | Studies in primates, including humans, show that the synapse density in the neocortex is relatively constant across areas and species (DeFelipe et al., 2002; Sherwood et al., 2020; O’Kusky, Colonnier, 1982; Cragg, 1967; Harrison et al., 2002). | Synaptic density variability found in specific cortical regions could be included (Cano-Astorga et al., 2021). In addition, gender specificity of synaptic density could be incorporated (Alonso-Nanclares et al., 2008). |
| Synapses           | All synapses are static with a transmission probability of 100%.                                                                                                | For simplicity, this assumption ignores the potential effects arising from synapse dynamics.                                                                                                                                                        | Future extensions can include a probability of transmission failures and different types of synaptic plasticity (see, e.g., Markram et al., 2015; Jiang et al., 2023).                                                    |
| Population sizes   | The laminar subdivisions are simplified into four layers 2/3, 4, 5, and 6. Layer 1 is ignored.                                                                  | Layers 2 and 3 are combined due to their similar connectivity and comparable response properties. Layer 1 has a low neuron density compared to the other layers.                                                                                    | Recent studies show data related to the composition and role of human layer 1 (Boldog et al., 2018; Schuman et al., 2021; Chartrand et al., 2023), which can be used to update our model.                                 |
| Population sizes   | The layer thicknesses from von Economo and Koskinas parcellation are mapped to Desikan-Killiany regions by averaging corresponding areas between parcellations. | Layer thickness is not available in the Desikan-Killiany parcellation. Our mapping reflects cytoarchitectonic similarity, averaging values across similar brain regions.                                                                            | Laminar thickness from BigBrain 3D atlas (Wagstyl et al., 2020) can be used to improve the model.                                                                                                                         |
| Population sizes   | The percentage of excitatory neurons per layer is kept constant across areas.                                                                                   | This is a simplification based on a lack of comprehensive area-specific data.                                                                                                                                                                       | Refinements can incorporate area-specific data. For instance, Jorstad et al. (2023) show E:I ratios for eight human cortical regions that include primary motor, somatosensory, auditory, visual, and association areas.  |
| Population sizes   | Non-simulated neurons are replaced by a stochastic drive in the form of Poisson spike trains.                                                                   | Comprehensive data on the activity of the non-modeled parts of the brain are not available. Furthermore, this simplification limits the number of parameters.                                                                                       | A recent study describes spontaneous cortical activity as stereotyped and non-Poissonian (Swindale et al., 2023). Different distributions could be tested in the model.                                                   |
| Local connectivity | We assume the spatial connection probability to be a spatially homogeneous three-dimensional exponential distribution.                                          | This is consistent with experimental studies reporting a three-dimensional exponential fall-off in connection probability (Perin et al., 2011; Maksimov et al., 2018).                                                                              | A future extension can make the spatial decay constant population-specific (Reimann et al., 2017; Senk et al., 2023) and take patchy connectivity into account.                                                           |
| Local connectivity | The Potjans and Diesmann (2014) model is used as a blueprint to define numbers of internal synapses per pair of populations.                                    | This aligns with the canonical microcircuit concept (Douglas et al., 1989; Douglas, Martin, 2004) due to limited area-specific data especially for human cortex.                                                                                    | Reconstructions derived from human tissue fragments scanned with serial section electron microscopy (Shapson-Coe et al., 2024) promise to deliver example synapse counts between local circuit neurons.                   |
| Local connectivity | External indegrees from Potjans and Diesmann (2014) determine the relative external indegrees for the different populations.                                    | This simplification is due to the lack of quantitative data about the local connectivity beyond the scale of a 1 mm <sup>2</sup> scale column.                                                                                                      | Since reconstructions based on electron microscopy are strongly limited in their volume due to the necessary postprocessing, similar simplifications seem necessary for the foreseeable future.                           |

**Table S3.** Heuristics used for model construction, with consideration of possible extensions (Part 2)

| Feature                 | Heuristic                                                                                                                                                                                                                                                  | Argument                                                                                                                                                                                                                                                  | Starting points for extensions                                                                                                                                                                                                                                                                                                                                  |
|-------------------------|------------------------------------------------------------------------------------------------------------------------------------------------------------------------------------------------------------------------------------------------------------|-----------------------------------------------------------------------------------------------------------------------------------------------------------------------------------------------------------------------------------------------------------|-----------------------------------------------------------------------------------------------------------------------------------------------------------------------------------------------------------------------------------------------------------------------------------------------------------------------------------------------------------------|
| Long-range connectivity | All inter-areal connections are confined to the 1 mm <sup>2</sup> areas represented in our model.                                                                                                                                                          | Given the absence of explicit spatial dependence in our microcircuits, we adopt a simplified approach to modeling inter-areal connections.                                                                                                                | Information on spatial divergence and convergence of inter-areal connections may be taken from studies by Colby et al. (1988); Salin et al. (1989); Gattass et al. (1997); Markov et al. (2014b).                                                                                                                                                               |
| Long-range connectivity | All inter-areal connections are excitatory.                                                                                                                                                                                                                | The simplification aligns with the prevalent excitatory nature of inter-areal projections.                                                                                                                                                                | Studies conducted in various species, including monkeys (Tomioka, Rockland, 2007) and other animals (McDonald, Burkhalter, 1993; Gonchar et al., 1995; Fabri, Manzoni, 1996, 2004; Tomioka et al., 2005; Pinto et al., 2006; Higo et al., 2007; Urrutia-Piñones et al., 2022), have reported a relatively small proportion of GABAergic long-range connections. |
| Long-range connectivity | All connections between different cortical areas are treated as white-matter connections.                                                                                                                                                                  | Long-range connections are predominantly mediated by myelinated white matter tracts.                                                                                                                                                                      | Cortical areas, especially adjacent ones, may also be connected to some extent via the gray matter (Vandeveldt et al., 1996; Anderson, Martin, 2009).                                                                                                                                                                                                           |
| Long-range connectivity | We neglect both subcortical and inter-hemispheric projections, and treat all nonlocal synapses as belonging to intra-hemispheric inter-areal projections.                                                                                                  | This simplification results from low presynaptic neuron percentages in subcortical structures (1%) (Markov et al., 2011) and a limited fraction of contralateral inter-areal projections (Dehay et al., 1988; Barbas et al., 2005; Rosen, Halgren, 2022). | The fraction of contralateral projections is regionally specific as reported by (Ruddy et al., 2017), and it could be incorporated to our model.                                                                                                                                                                                                                |
| Long-range connectivity | We use regularities derived from macaque data based on retrograde tracing (Markov et al., 2014b,a; Schmidt et al., 2018) with human neuron densities to arrive at estimates of the layer-specificity of the presynaptic neurons (laminar source patterns). | This is due to the lack of relevant human-specific data.                                                                                                                                                                                                  | Laminar source patterns specific to human cerebral cortex could be constructed using polarized light imaging (Axaer et al., 2011) from histological brain sections or data from postmortem tracing (Galuske et al., 2000; Tardif, Clarke, 2001; Seehaus et al., 2013).                                                                                          |
| Long-range connectivity | The SLN level is used as an indicator of the type of laminar termination pattern.                                                                                                                                                                          | This follows the observed statistical relationship between laminar sources and termination patterns as documented in combined anterograde and retrograde tracing studies gathered from the CoCoMac database (Schmidt et al., 2018).                       | Similar to source patterns, human-specific laminar target patterns could be obtained using polarized light imaging (Axaer et al., 2011) from histological brain sections or data from postmortem tracing (Galuske et al., 2000; Tardif, Clarke, 2001; Seehaus et al., 2013).                                                                                    |
| Long-range connectivity | All inhibitory postsynaptic neurons are in the same layer as their synapses.                                                                                                                                                                               | The dendritic tree of most inhibitory is confined to a single layer (Gouwens et al., 2019).                                                                                                                                                               | The morphologies of inhibitory neurons available through the Allen Cell Types Database ( <a href="http://celltypes.brain-map.org/">http://celltypes.brain-map.org/</a> ) could be used to quantify the location of the dendritic tree.                                                                                                                          |
| Long-range connectivity | The fraction of long-range synapses equals the fraction of long-range projecting neurons.                                                                                                                                                                  | A preliminary analysis of reconstructed axons (Winnubst et al., 2019) corroborates the assumption.                                                                                                                                                        | For mice, fully reconstructed axons are available (Winnubst et al., 2019) which could be used as a starting point for a detailed analysis.                                                                                                                                                                                                                      |



**Table S4.** Number of neurons per population for all areas of the model.

| Area                     | 2/3 E | 2/3 I | 4 E   | 4 I   | 5 E   | 5 I  | 6 E   | 6 I  |
|--------------------------|-------|-------|-------|-------|-------|------|-------|------|
| bankssts                 | 39130 | 21070 | 17380 | 4620  | 20280 | 5720 | 14534 | 2366 |
| caudalanteriorcingulate  | 13179 | 7096  | 0     | 0     | 11954 | 3372 | 18297 | 2979 |
| caudalmiddlefrontal      | 26536 | 14289 | 0     | 0     | 9262  | 2612 | 13207 | 2150 |
| cuneus                   | 35311 | 19014 | 18249 | 4851  | 11466 | 3234 | 10954 | 1783 |
| entorhinal               | 15987 | 8608  | 0     | 0     | 4727  | 1333 | 6505  | 1059 |
| frontalpole              | 22425 | 12075 | 18960 | 5040  | 12272 | 3461 | 18060 | 2940 |
| fusiform                 | 42250 | 22750 | 15800 | 4200  | 16575 | 4675 | 13868 | 2258 |
| inferiorparietal         | 25350 | 13650 | 27650 | 7350  | 7722  | 2178 | 22188 | 3612 |
| inferiortemporal         | 22912 | 12338 | 17064 | 4536  | 31200 | 8800 | 36120 | 5880 |
| insula                   | 24570 | 13230 | 19552 | 5197  | 15113 | 4262 | 17823 | 2902 |
| isthmuscingulate         | 20950 | 11280 | 10902 | 2898  | 14820 | 4180 | 17350 | 2824 |
| lateraloccipital         | 32110 | 17290 | 0     | 0     | 10920 | 3080 | 10084 | 1642 |
| lateralorbitofrontal     | 15600 | 8400  | 10665 | 2835  | 16380 | 4620 | 17200 | 2800 |
| lingual                  | 36584 | 19699 | 17959 | 4774  | 14404 | 4063 | 12148 | 1978 |
| medialorbitofrontal      | 16071 | 8654  | 4148  | 1102  | 11290 | 3184 | 12664 | 2062 |
| middletemporal           | 22912 | 12338 | 17064 | 4536  | 31200 | 8800 | 36120 | 5880 |
| paracentral              | 42157 | 22700 | 51251 | 13624 | 7342  | 2071 | 15741 | 2562 |
| parahippocampal          | 29315 | 15785 | 0     | 0     | 14332 | 4042 | 0     | 0    |
| parsopercularis          | 24635 | 13265 | 8058  | 2142  | 10733 | 3027 | 16340 | 2660 |
| parsorbitalis            | 19500 | 10500 | 0     | 0     | 16322 | 4603 | 14216 | 2314 |
| parstriangularis         | 20703 | 11148 | 12166 | 3234  | 6388  | 1802 | 16706 | 2720 |
| pericalcarine            | 29250 | 15750 | 93694 | 24906 | 9477  | 2673 | 33540 | 5460 |
| postcentral              | 22975 | 12371 | 92430 | 24570 | 8190  | 2310 | 17200 | 2800 |
| posteriorcingulate       | 21176 | 11402 | 16649 | 4426  | 12434 | 3507 | 15960 | 2598 |
| precentral               | 24818 | 13363 | 0     | 0     | 10608 | 2992 | 21500 | 3500 |
| precuneus                | 28708 | 15458 | 22910 | 6090  | 8112  | 2288 | 13416 | 2184 |
| rostralanteriorcingulate | 13179 | 7096  | 0     | 0     | 11954 | 3372 | 18297 | 2979 |
| rostralmiddlefrontal     | 22539 | 12136 | 12087 | 3213  | 8268  | 2332 | 13969 | 2274 |
| superiorfrontal          | 24938 | 13428 | 7149  | 1900  | 8788  | 2479 | 15255 | 2483 |
| superiorparietal         | 28708 | 15458 | 22910 | 6090  | 8112  | 2288 | 13416 | 2184 |
| superiortemporal         | 30225 | 16275 | 14220 | 3780  | 15600 | 4400 | 17415 | 2835 |
| supramarginal            | 44460 | 23940 | 32390 | 8610  | 13162 | 3712 | 19350 | 3150 |
| temporalpole             | 22620 | 12180 | 5925  | 1575  | 21840 | 6160 | 33540 | 5460 |
| transverse temporal      | 45695 | 24605 | 51942 | 13807 | 19500 | 5500 | 16770 | 2730 |

**Table S5.** Average number of incoming model-internal local synapses per neuron for all areas of the model, rounded to the nearest integer.

| Area                     | 2/3 E | 2/3 I | 4 E  | 4 I   | 5 E   | 5 I   | 6 E   | 6 I   |
|--------------------------|-------|-------|------|-------|-------|-------|-------|-------|
| bankssts                 | 10214 | 11451 | 2853 | 6936  | 11376 | 6934  | 3778  | 3579  |
| caudalanteriorcingulate  | 16103 | 19676 | -    | -     | 23988 | 15444 | 12523 | 12739 |
| caudalmiddlefrontal      | 17839 | 20438 | -    | -     | 18289 | 10829 | 6659  | 7637  |
| cuneus                   | 8637  | 9345  | 2510 | 5974  | 8344  | 4843  | 2687  | 2664  |
| entorhinal               | 28485 | 32404 | -    | -     | 27770 | 16209 | 9336  | 11016 |
| frontalpole              | 11743 | 12655 | 5223 | 11209 | 13152 | 7893  | 5824  | 5419  |
| fusiform                 | 10859 | 12042 | 2743 | 7019  | 11130 | 6611  | 3573  | 3590  |
| inferiorparietal         | 15112 | 15407 | 7717 | 15954 | 14446 | 8119  | 7082  | 6762  |
| inferiortemporal         | 9183  | 10914 | 4694 | 10267 | 14961 | 9817  | 7499  | 6717  |
| insula                   | 13133 | 14363 | 5522 | 11916 | 15282 | 9316  | 6395  | 5841  |
| isthmuscingulate         | 12481 | 14161 | 4646 | 10847 | 15665 | 9758  | 6744  | 6380  |
| lateraloccipital         | 10705 | 12287 | -    | -     | 10780 | 6397  | 3265  | 3769  |
| lateralorbitofrontal     | 10101 | 11734 | 4466 | 9864  | 14684 | 9457  | 6679  | 5991  |
| lingual                  | 9284  | 10175 | 2661 | 6379  | 9460  | 5599  | 3084  | 3003  |
| medialorbitofrontal      | 15659 | 18258 | 4673 | 12208 | 20079 | 12615 | 8426  | 8280  |
| middletemporal           | 9183  | 10914 | 4694 | 10267 | 14961 | 9817  | 7499  | 6717  |
| paracentral              | 7082  | 7055  | 3303 | 6504  | 5995  | 3250  | 2209  | 1961  |
| parahippocampal          | 8809  | 10408 | -    | -     | 9803  | 6095  | -     | -     |
| parsopercularis          | 16861 | 18816 | 5038 | 13011 | 18170 | 10842 | 7510  | 7768  |
| parsorbitalis            | 15615 | 19124 | -    | -     | 22085 | 14288 | 8690  | 8567  |
| parstriangularis         | 16906 | 17994 | 6652 | 15503 | 16509 | 9412  | 7778  | 8036  |
| pericalcarine            | 4294  | 3913  | 3436 | 5990  | 3947  | 2150  | 2109  | 1615  |
| postcentral              | 5956  | 5310  | 4918 | 8154  | 5399  | 2949  | 2498  | 1598  |
| posteriorcingulate       | 13088 | 14265 | 5542 | 12016 | 15025 | 9110  | 6415  | 5929  |
| precentral               | 20536 | 23666 | -    | -     | 22793 | 13659 | 10680 | 11920 |
| precuneus                | 14134 | 14776 | 5494 | 11887 | 13184 | 7470  | 4998  | 4806  |
| rostralanteriorcingulate | 16103 | 19676 | -    | -     | 23988 | 15444 | 12523 | 12739 |
| rostralmiddlefrontal     | 16239 | 17572 | 5655 | 13348 | 16424 | 9575  | 6747  | 6810  |
| superiorfrontal          | 17625 | 19515 | 4914 | 13109 | 17893 | 10471 | 7263  | 7770  |
| superiorparietal         | 14134 | 14775 | 5494 | 11887 | 13183 | 7469  | 4998  | 4806  |
| superiortemporal         | 12469 | 13894 | 4008 | 9624  | 13960 | 8459  | 5388  | 5237  |
| supramarginal            | 11490 | 12115 | 4214 | 9289  | 10835 | 6180  | 3978  | 3851  |
| temporalpole             | 13613 | 16240 | 5599 | 14080 | 20199 | 12963 | 10713 | 10537 |
| transversetemporal       | 7846  | 8164  | 3475 | 6872  | 7908  | 4627  | 2783  | 2330  |

**Table S6.** Average number of incoming long-range synapses per neuron for all areas of the model, rounded to the nearest integer.

| Area                     | 2/3 E | 2/3 I | 4 E   | 4 I   | 5 E  | 5 I  | 6 E  | 6 I  |
|--------------------------|-------|-------|-------|-------|------|------|------|------|
| bankssts                 | 2720  | 663   | 1300  | 417   | 1666 | 905  | 4901 | 3084 |
| caudalanteriorcingulate  | 11280 | 4191  | -     | -     | 1316 | 873  | 1960 | 1671 |
| caudalmiddlefrontal      | 4648  | 1535  | -     | -     | 2970 | 1908 | 5758 | 5293 |
| cuneus                   | 2049  | 260   | 1642  | 1783  | 1351 | 381  | 3547 | 1776 |
| entorhinal               | 12207 | 4854  | -     | -     | 246  | 0    | 45   | 0    |
| frontalpole              | 3834  | 671   | 838   | 220   | 2071 | 797  | 4038 | 2315 |
| fusiform                 | 2715  | 709   | 1380  | 527   | 1672 | 918  | 5194 | 4019 |
| inferiorparietal         | 4003  | 1022  | 1059  | 770   | 4281 | 2248 | 4661 | 4168 |
| inferiortemporal         | 4087  | 985   | 1452  | 587   | 1443 | 783  | 3587 | 2891 |
| insula                   | 3917  | 758   | 1357  | 886   | 2110 | 960  | 4850 | 3282 |
| isthmuscingulate         | 4084  | 866   | 2585  | 2108  | 1784 | 1012 | 3396 | 2545 |
| lateraloccipital         | 2766  | 903   | -     | -     | 1593 | 968  | 4948 | 4461 |
| lateralorbitofrontal     | 3728  | 690   | 1202  | 463   | 1361 | 584  | 4300 | 3105 |
| lingual                  | 2324  | 329   | 1574  | 1408  | 1489 | 482  | 4129 | 1934 |
| medialorbitofrontal      | 4962  | 648   | 12467 | 16077 | 1386 | 505  | 2453 | 1881 |
| middletemporal           | 4111  | 929   | 1406  | 493   | 1462 | 739  | 3646 | 2727 |
| paracentral              | 2350  | 358   | 270   | 52    | 2363 | 788  | 3485 | 1923 |
| parahippocampal          | 3548  | 708   | -     | -     | 1795 | 1252 | -    | -    |
| parsopercularis          | 4488  | 1111  | 3135  | 2014  | 2380 | 1133 | 4890 | 4015 |
| parsorbitalis            | 8842  | 3278  | -     | -     | 925  | 587  | 2607 | 2310 |
| parstriangularis         | 4826  | 1284  | 1855  | 1155  | 3504 | 1883 | 3746 | 3156 |
| pericalcarine            | 2556  | 348   | 128   | 0     | 2580 | 905  | 2064 | 1041 |
| postcentral              | 4411  | 539   | 184   | 31    | 3477 | 1433 | 4260 | 2380 |
| posteriorcingulate       | 4251  | 770   | 1728  | 1449  | 2016 | 901  | 3789 | 2433 |
| precentral               | 8695  | 3349  | -     | -     | 1901 | 1201 | 2374 | 2127 |
| precuneus                | 3221  | 664   | 1727  | 1861  | 2892 | 1273 | 5040 | 4228 |
| rostralanteriorcingulate | 8713  | 2954  | -     | -     | 2211 | 1514 | 3387 | 2898 |
| rostralmiddlefrontal     | 4584  | 1079  | 1866  | 1043  | 2906 | 1479 | 4372 | 3175 |
| superiorfrontal          | 4378  | 1042  | 4206  | 3286  | 2936 | 1435 | 4556 | 3509 |
| superiorparietal         | 3197  | 688   | 1816  | 2016  | 2830 | 1318 | 4849 | 4381 |
| superiortemporal         | 3258  | 796   | 2287  | 2031  | 1687 | 895  | 4102 | 3525 |
| supramarginal            | 2962  | 450   | 1314  | 1243  | 2133 | 631  | 4266 | 2329 |
| temporalpole             | 5529  | 928   | 12155 | 14462 | 1632 | 732  | 2657 | 2184 |
| transversetemporal       | 2531  | 394   | 346   | 0     | 1650 | 555  | 4820 | 2127 |

**Table S7.** Number of incoming external synapses per neuron for all areas of the model. These numbers are multiplied by the rate of individual Poisson inputs to obtain the total Poisson input rate to each neuron.

| Area                     | 2/3 E | 2/3 I | 4 E  | 4 I  | 5 E   | 5 I   | 6 E   | 6 I   |
|--------------------------|-------|-------|------|------|-------|-------|-------|-------|
| bankssts                 | 3735  | 3502  | 4902 | 4435 | 4669  | 4435  | 6770  | 4902  |
| caudalanteriorcingulate  | 6642  | 6227  | -    | -    | 8303  | 7888  | 12039 | 8718  |
| caudalmiddlefrontal      | 6901  | 6470  | -    | -    | 8626  | 8195  | 12508 | 9058  |
| cuneus                   | 3001  | 2814  | 3939 | 3564 | 3752  | 3564  | 5440  | 3939  |
| entorhinal               | 11286 | 10581 | -    | -    | 14107 | 13402 | 20456 | 14813 |
| frontalpole              | 3843  | 3603  | 5044 | 4564 | 4804  | 4564  | 6966  | 5044  |
| fusiform                 | 3949  | 3703  | 5184 | 4690 | 4937  | 4690  | 7158  | 5184  |
| inferiorparietal         | 4628  | 4339  | 6074 | 5496 | 5785  | 5496  | 8388  | 6074  |
| inferiortemporal         | 3799  | 3562  | 4986 | 4511 | 4749  | 4511  | 6886  | 4986  |
| insula                   | 4426  | 4149  | 5809 | 5256 | 5532  | 5256  | 8022  | 5809  |
| isthmuscingulate         | 4442  | 4164  | 5830 | 5275 | 5552  | 5275  | 8051  | 5830  |
| lateraloccipital         | 4479  | 4199  | -    | -    | 5599  | 5319  | 8118  | 5879  |
| lateralorbitofrontal     | 3869  | 3627  | 5078 | 4594 | 4836  | 4594  | 7012  | 5078  |
| lingual                  | 3277  | 3073  | 4302 | 3892 | 4097  | 3892  | 5940  | 4302  |
| medialorbitofrontal      | 5884  | 5516  | 7722 | 6987 | 7355  | 6987  | 10664 | 7722  |
| middletemporal           | 3799  | 3562  | 4986 | 4511 | 4749  | 4511  | 6886  | 4986  |
| paracentral              | 2230  | 2090  | 2927 | 2648 | 2787  | 2648  | 4041  | 2927  |
| parahippocampal          | 4626  | 4337  | -    | -    | 5782  | 5493  | -     | -     |
| parsopercularis          | 5793  | 5431  | 7604 | 6879 | 7242  | 6879  | 10500 | 7604  |
| parsorbitalis            | 6730  | 6310  | -    | -    | 8413  | 7992  | 12199 | 8834  |
| parstriangularis         | 5297  | 4966  | 6952 | 6290 | 6621  | 6290  | 9600  | 6952  |
| pericalcarine            | 1470  | 1378  | 1929 | 1745 | 1837  | 1745  | 2664  | 1929  |
| postcentral              | 2159  | 2024  | 2834 | 2564 | 2699  | 2564  | 3913  | 2834  |
| posteriorcingulate       | 4368  | 4095  | 5733 | 5187 | 5460  | 5187  | 7917  | 5733  |
| precentral               | 7428  | 6964  | -    | -    | 9285  | 8821  | 13464 | 9750  |
| precuneus                | 4512  | 4230  | 5922 | 5358 | 5640  | 5358  | 8179  | 5922  |
| rostralanteriorcingulate | 6642  | 6227  | -    | -    | 8303  | 7887  | 12039 | 8718  |
| rostralmiddlefrontal     | 5307  | 4975  | 6965 | 6302 | 6633  | 6302  | 9618  | 6965  |
| superiorfrontal          | 6015  | 5639  | 7895 | 7143 | 7519  | 7143  | 10903 | 7895  |
| superiorparietal         | 4512  | 4230  | 5923 | 5359 | 5641  | 5359  | 8179  | 5923  |
| superiortemporal         | 4335  | 4064  | 5689 | 5147 | 5418  | 5147  | 7856  | 5689  |
| supramarginal            | 3724  | 3491  | 4887 | 4422 | 4655  | 4422  | 6749  | 4887  |
| temporalpole             | 5391  | 5054  | 7076 | 6402 | 6739  | 6402  | 9772  | 7076  |
| transversetemporal       | 2573  | 2413  | 3378 | 3056 | 3217  | 3056  | 4664  | 3378  |

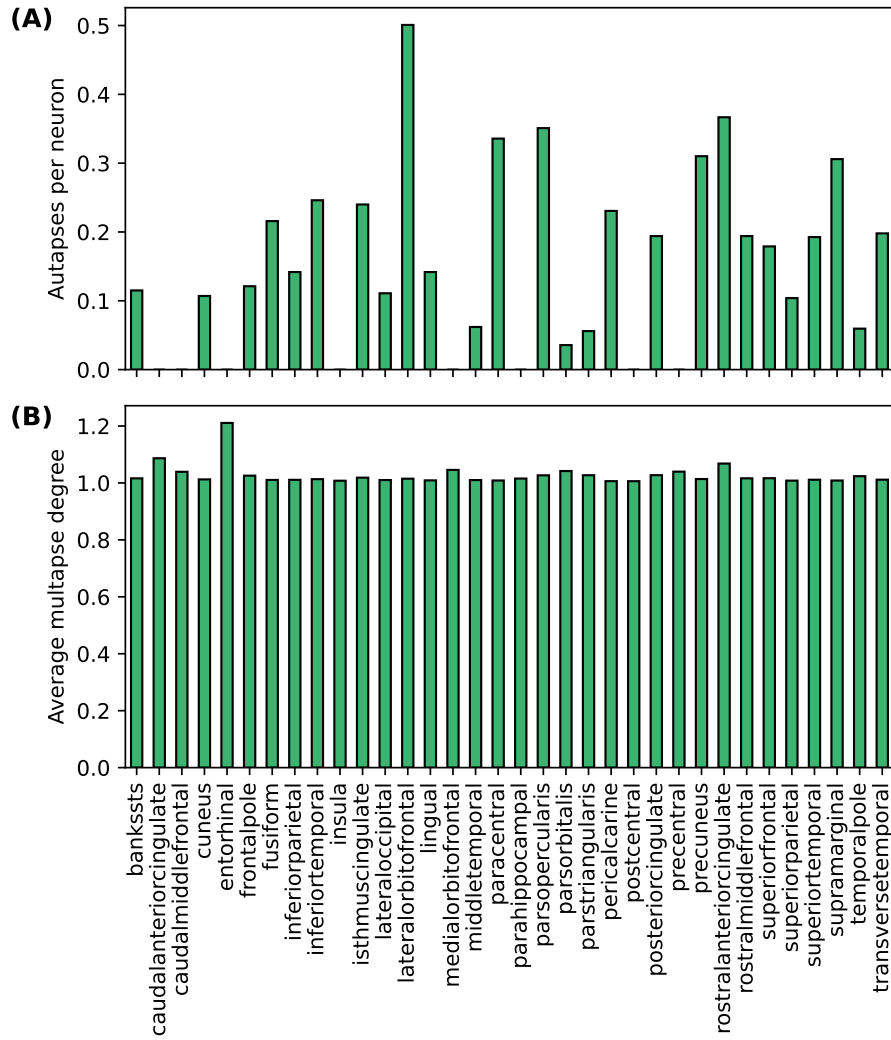

**Fig. S2.** Average number of autapses (self-synapses) per neuron **(A)** and average number of synapses between a pair of connected neurons (multapses) **(B)**. The average multipapse degrees are obtained taking into account all source populations both within and outside the given target area. They are first calculated for each population within the given target area and then averaged across those populations. The average numbers of autapses are similarly obtained by first computing them for each population within an area and then averaging across those populations.

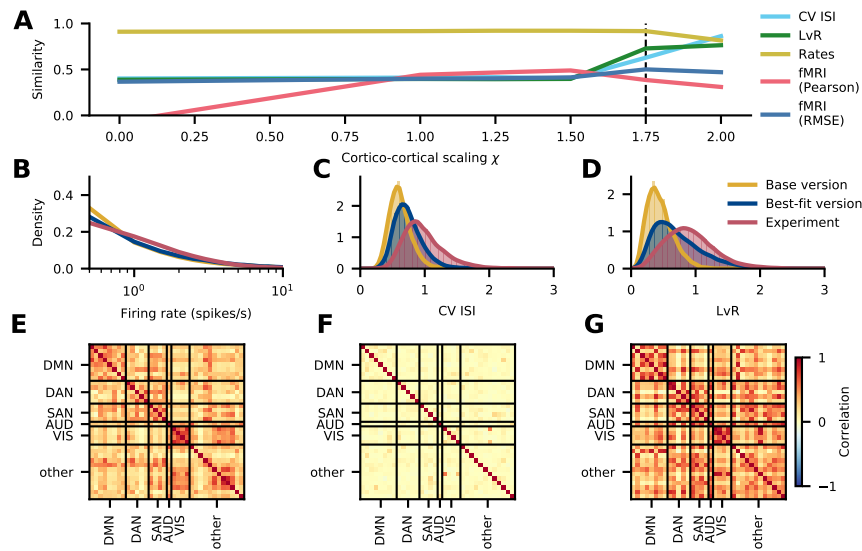

**Fig. S3.** Scaling plot with  $g = -2$ . Simulations abruptly fail at  $\chi > 2$  and reach a high-activity state that cannot be simulated in a reasonable time. The vertical dashed line at  $\chi = 1.75$  corresponds to the chosen best-fit version where the agreement with experimental data is maximized. The similarities of the CV ISI, LvR, and rates stay flat across most of the range of  $\chi$  while the fMRI Pearson correlation shows a mostly upward trend (A). The match of the firing rates (B), CV ISI (C) and LvR (D) to the experimental data is better in the best-fit version compared to the base version. The functional connectivity in the base version is uniformly weak (F), while it is more differentiated in the best-fit version (G).

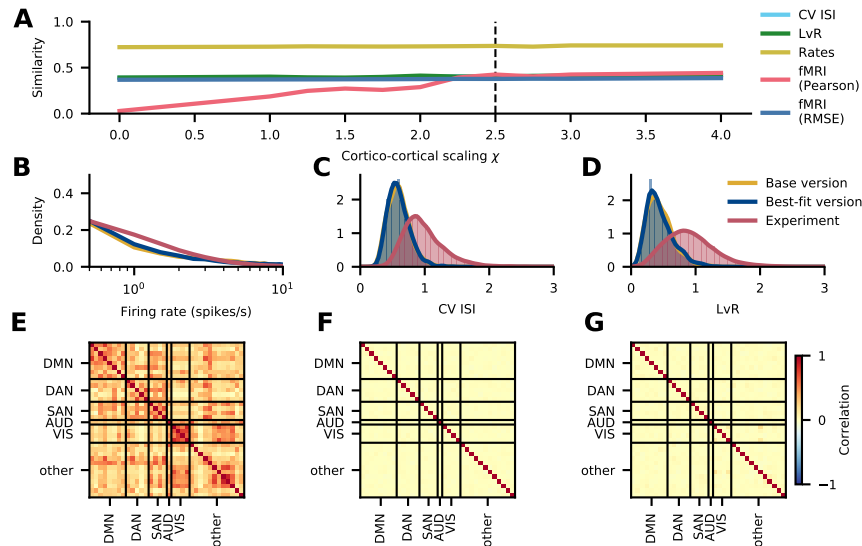

**Fig. S4.** Scaling plot with neuron parameters distributed according to the values for human neurons from the Allen Cell Types Database (<https://celltypes.brain-map.org/>; cf. Further Model Specifications). As this realization of the model does not show a unique best-fit solution, the vertical line at  $\chi = 2.5$  shows the chosen best-fit version, similar to the original model. While the fMRI Pearson correlation benefits from increasing the inter-areal scaling factors, all other similarities stay constant. Simulations at  $\chi > 4$  reach a high-activity state that cannot be simulated in a reasonable time (A). The rates are explained equally well in the base version and the best-fit version, but less well than in the model without distributed neuron parameters (cf. Fig. 5) (B). Neither the CV ISI (C) nor the LvR (D) is well explained in either the base or the best-fit version. The functional connectivity in both the base version (F) and the best-fit version (G) is weak, unlike the experimental functional connectivity (E), although the Pearson similarity measure indicates that the best-fit version captures the structure of the functional connectivity better.

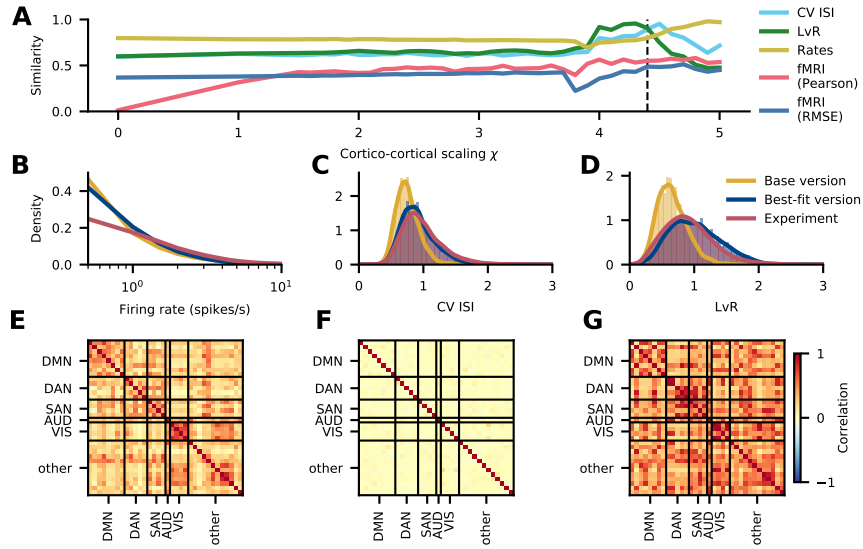

**Fig. S5.** Scaling plot with different synaptic time constants,  $\tau_{s,E} = 2$  and  $\tau_{s,I} = 4$ . The membrane time constants were also adjusted to  $\tau_{m,E} = 10$  and  $\tau_{m,I} = 7$ . The changes in the time constants directly affect the PSPs; therefore, we multiplied the PSPs onto inhibitory neurons by a factor of  $10/7$ . With these adjustments, we were able to obtain a similar best-fit solution as in the original model, but with a stronger inter-areal scaling factor, indicated by the vertical line at  $\chi = 4.4$  in (A). The similarities of rates, CV ISI, LvR, and functional connectivity remain roughly constant for cortico-cortical scaling factors between 1.0 and 3.6. At the best-fit point, all similarities—except for LvR—show a slight increase. Beyond this point, the rate similarity continues to increase, while the other measures either decrease or remain constant. For firing rates above 1 spike/s, both the base and best-fit versions match the experimental data well (B). The CV ISI (C) and LvR (D) in the best-fit version closely align with the experimental data. Similarly to the original model, the experimental functional connectivity (E) is better replicated in the best-fit version (G) compared to the base version (F).

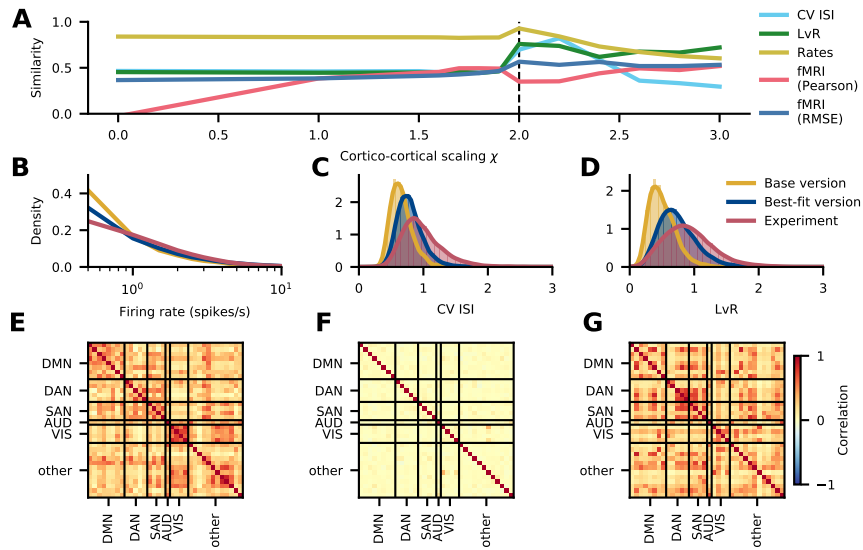

**Fig. S6.** Scaling plot using layer-resolved excitatory-to-inhibitory ratios of neuron densities from Gabbott, Somogyi (1986); Binzegger et al. (2004); Potjans, Diesmann (2014). The main difference compared to Shapson-Coe et al. (2024) is the higher fraction of excitatory cells in layer 2/3: 0.78 vs. 0.65. The other fractions are similar between the two studies: layer 4: 0.80 vs. 0.79, layer 5: 0.82 vs. 0.78, and layer 6: 0.83 vs. 0.86 for Binzegger et al. (2004); Potjans, Diesmann (2014) and Shapson-Coe et al. (2024), respectively. In this model realization, the additional scaling parameter  $\chi_I$  for inter-areal connections onto inhibitory neurons is  $\chi_I = 1$ . The similarities of rates, CV ISI, LvR, and fMRI Pearson correlation stay roughly constant for inter-areal scaling factors  $\chi < 2$ . The best-fit version is shown as a dashed vertical line at  $\chi = 2$ . Here, the distributions of rates, CV ISI, and LvR match the experimental data well, and the fMRI RMSE is better than in the base version, while the fMRI Pearson correlation is slightly worse. For  $\chi > 2$ , the similarities of rates and CV ISI slowly deteriorate, while the fMRI Pearson correlation improves (A). The match of the firing rates (B), CV ISI (C) and LvR (D) to the experimental data is better in the best-fit version compared to the base version. The functional connectivity in the base version is uniformly weak (F), while it is more differentiated in the best-fit version (G).

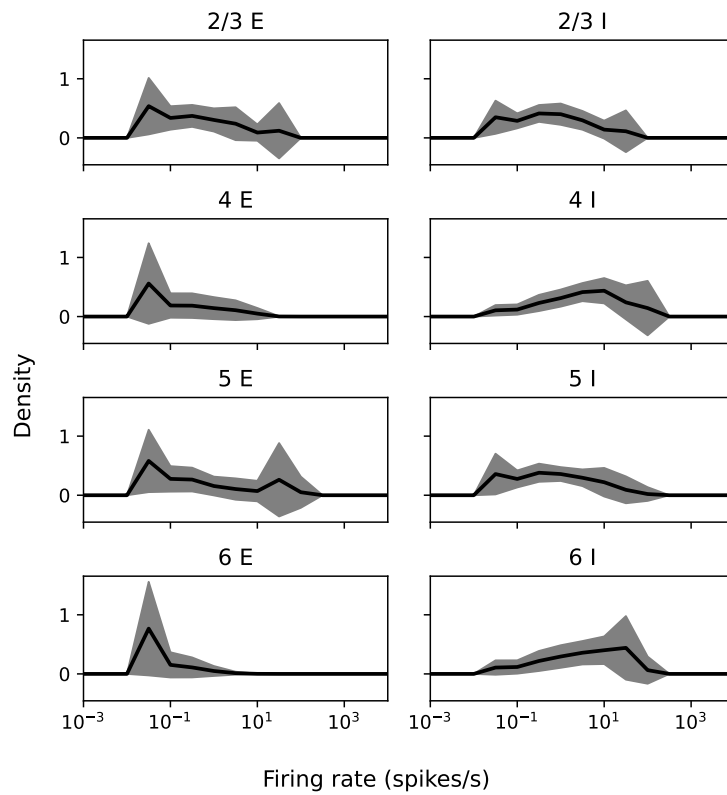

**Fig. S7.** Firing rate distribution density for the best-fit version ( $\chi = 2.5$ ) in the original model, averaged across areas. The firing rate distribution densities of individual neurons were calculated for each population type (E and I) and layer (2/3, 4, 5, and 6) in a given area. Then, these distributions for each population were averaged across areas and plotted as a solid black line, with the standard deviation represented by the shaded region.



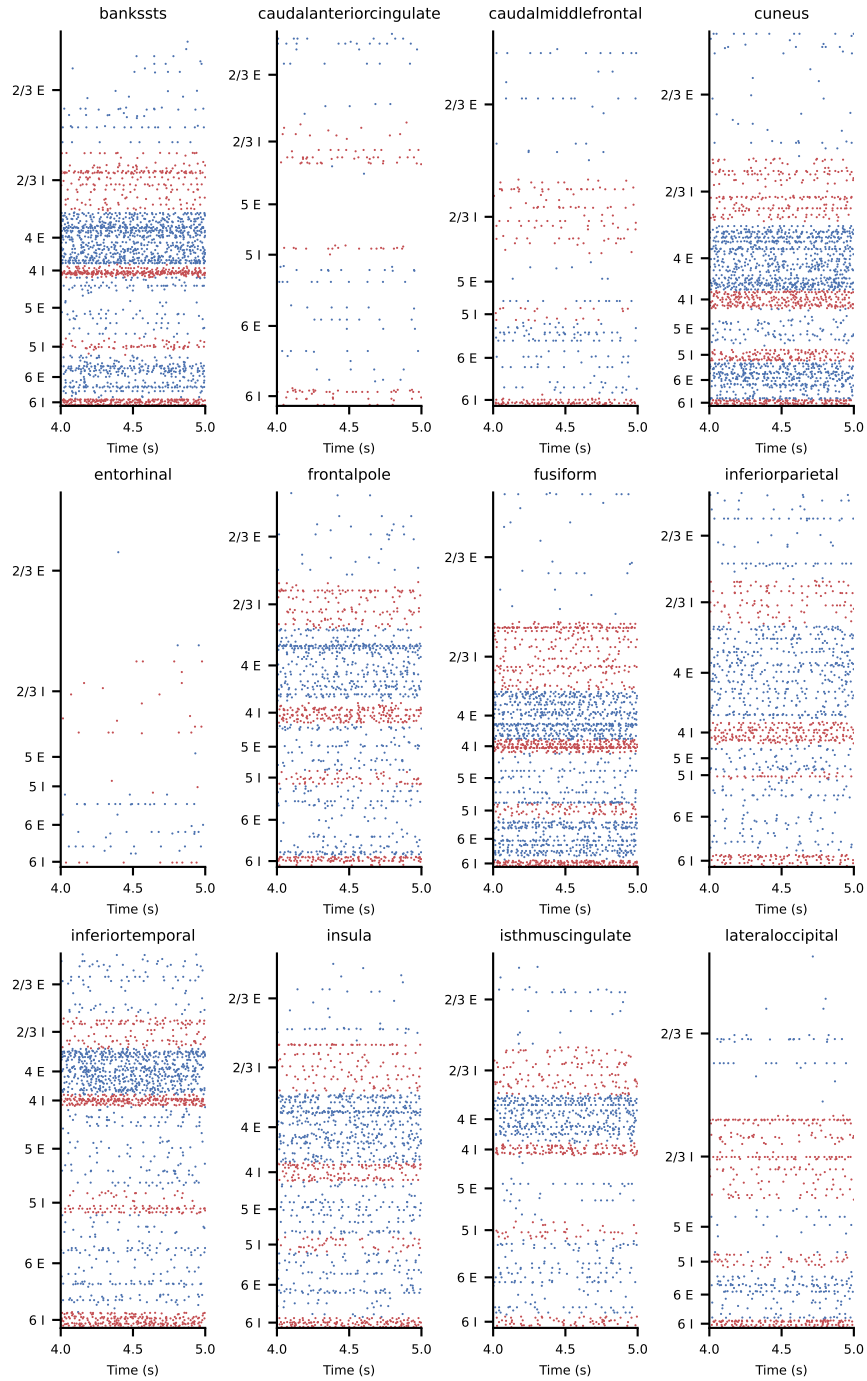

**Fig. S8.** Raster plots for the version without long-range inter-areal connections ( $\chi = 0$ ). Subsampled to 2.5% of the excitatory (blue) and inhibitory (red) neurons.

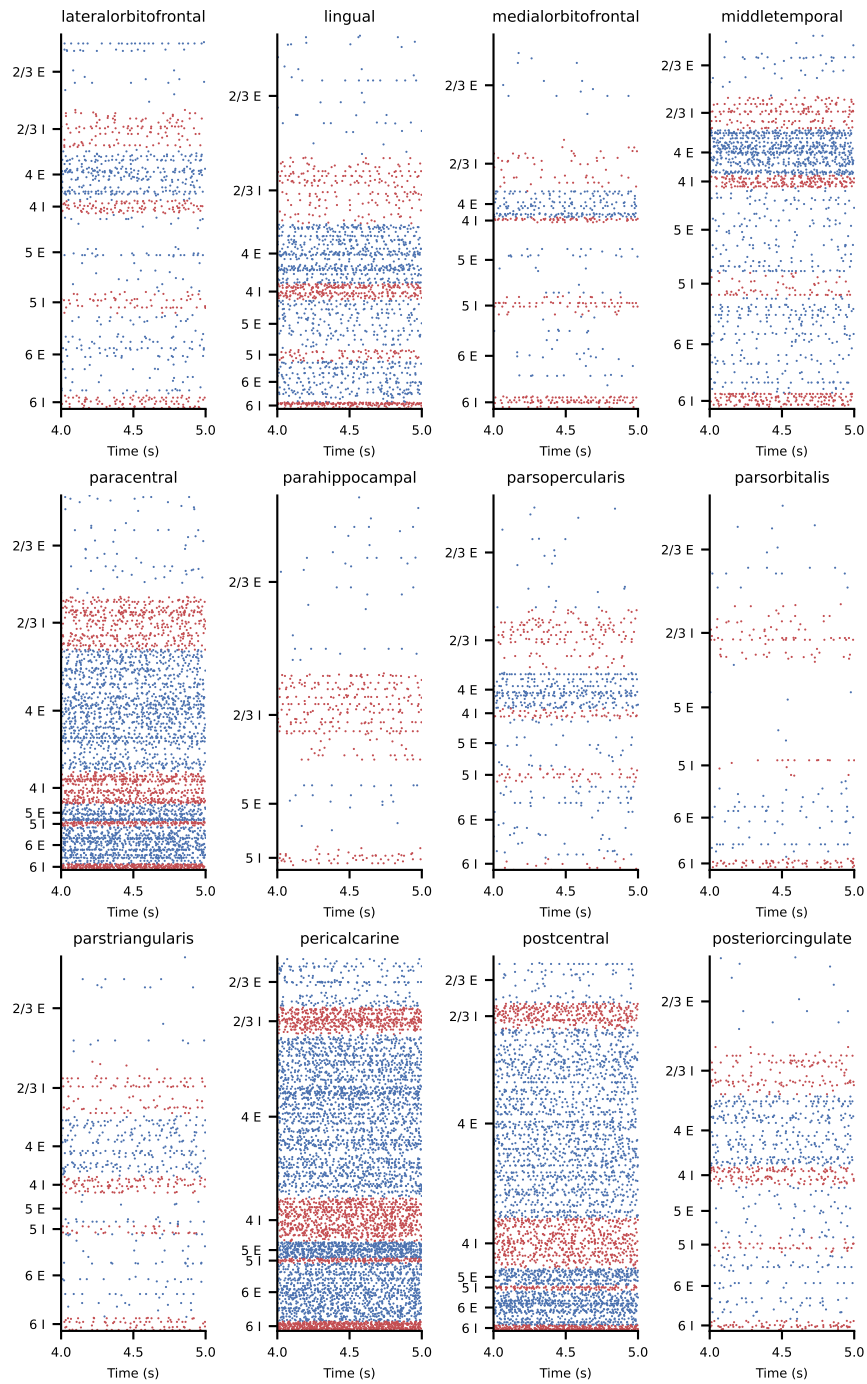

**Fig. S9.** Raster plots for the version without long-range inter-areal connections ( $\chi = 0$ ). Subsampled to 2.5% of the excitatory (blue) and inhibitory (red) neurons.

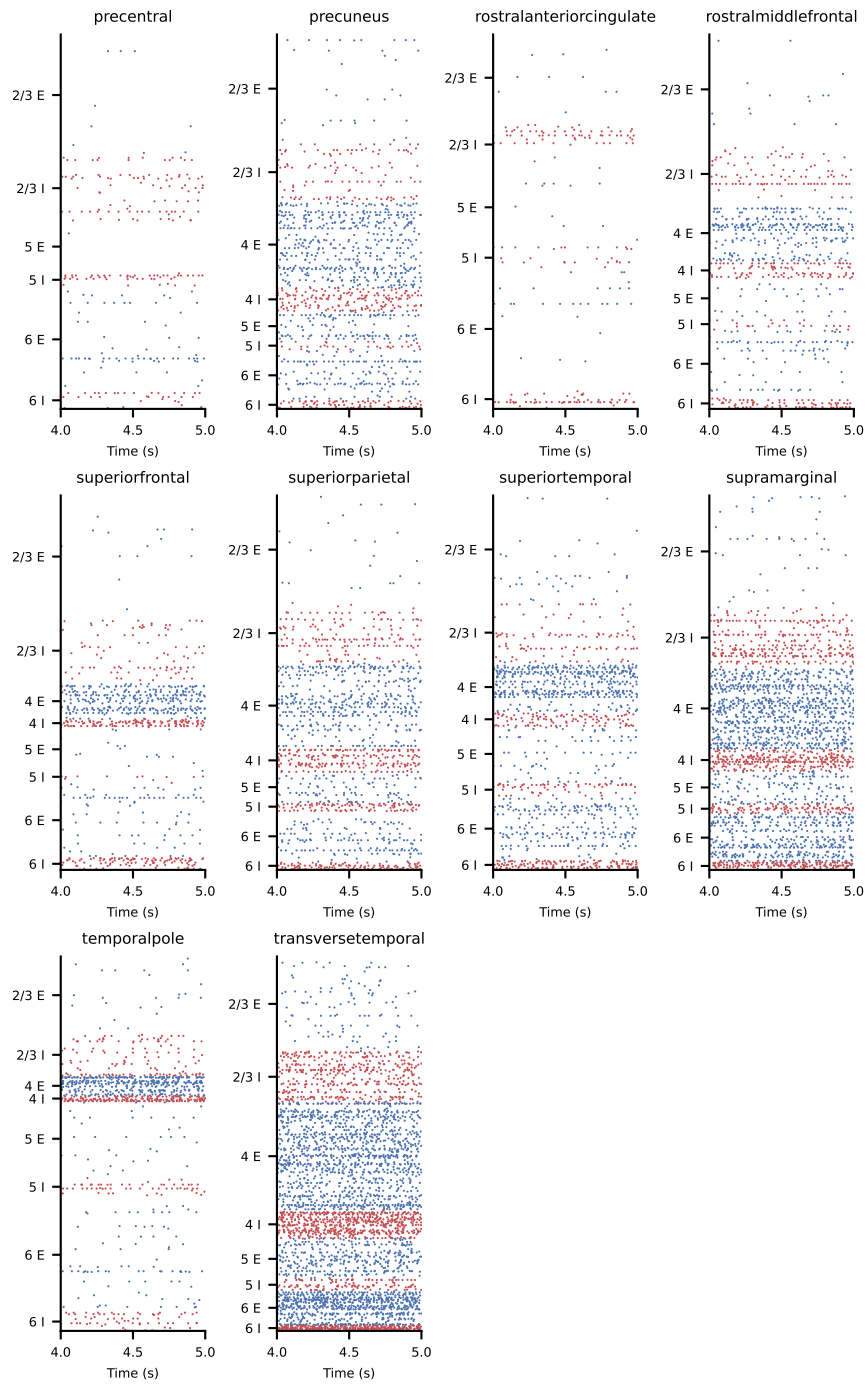

**Fig. S10.** Raster plots for the version without long-range inter-areal connections ( $\chi = 0$ ). Subsampled to 2.5% of the excitatory (blue) and inhibitory (red) neurons.

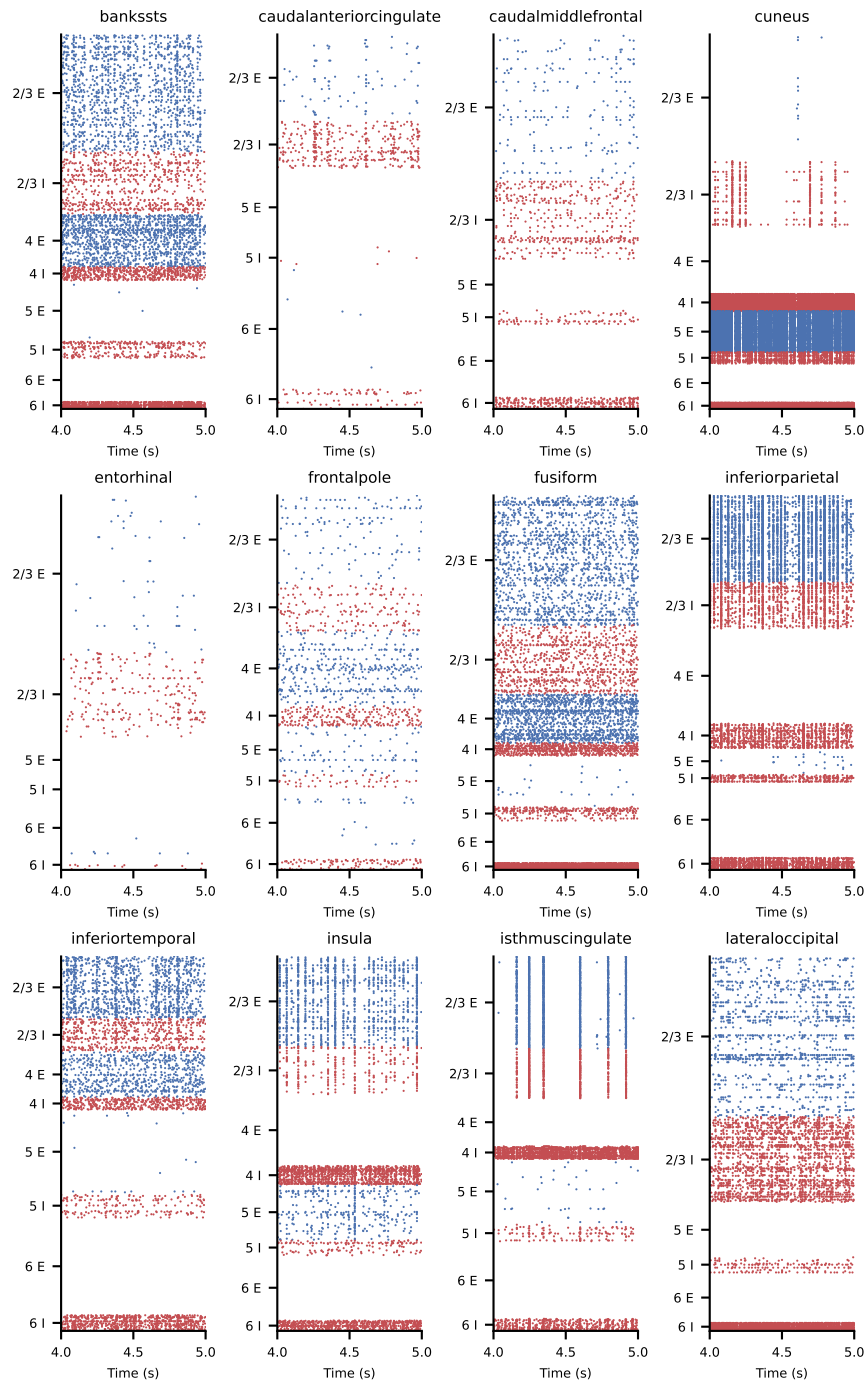

**Fig. S11.** Raster plots for the best-fit version. Subsampled to 2.5% of the excitatory (blue) and inhibitory (red) neurons.

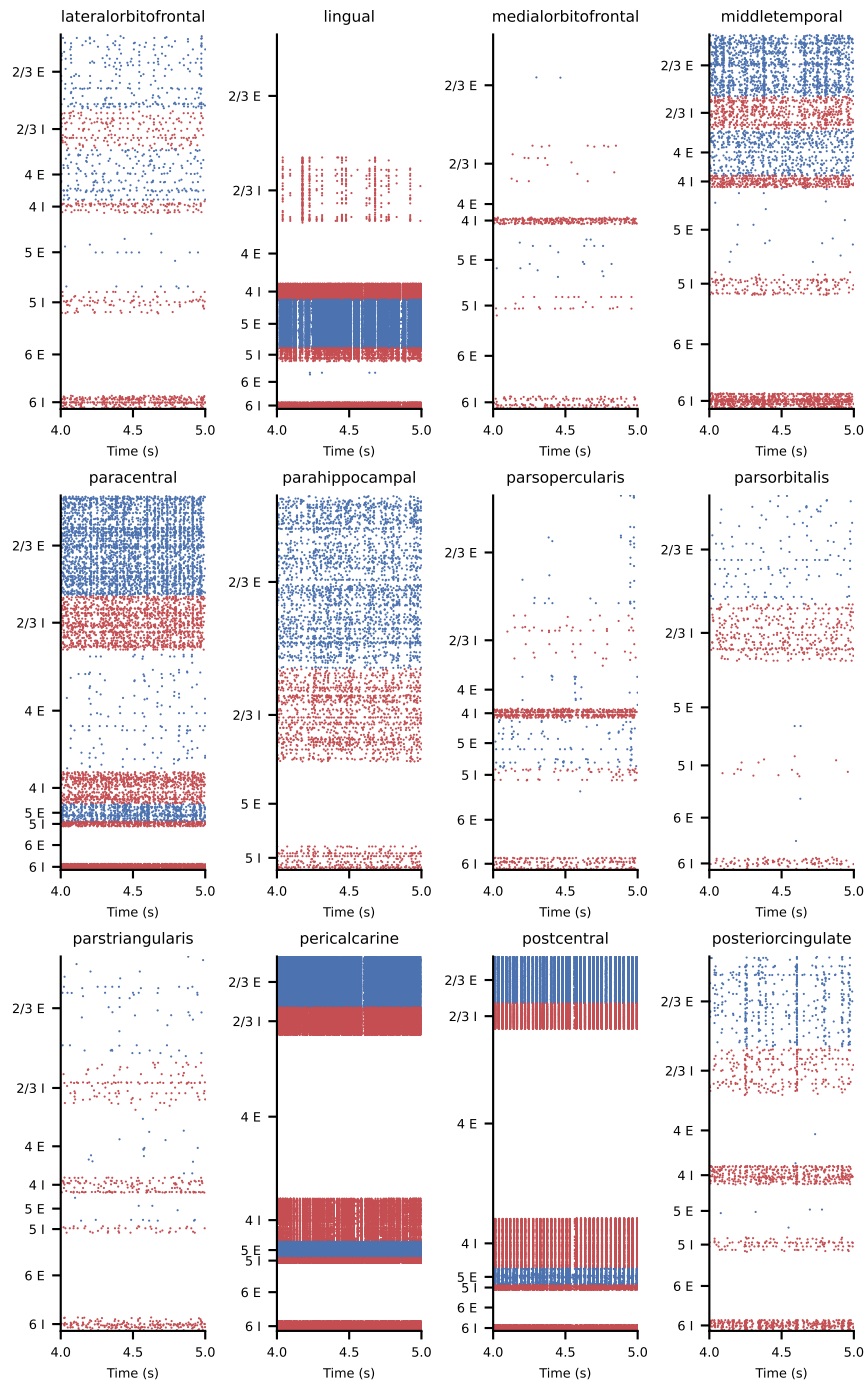

Fig. S12. Raster plots for the best-fit version. Subsampled to 2.5% of the excitatory (blue) and inhibitory (red) neurons.

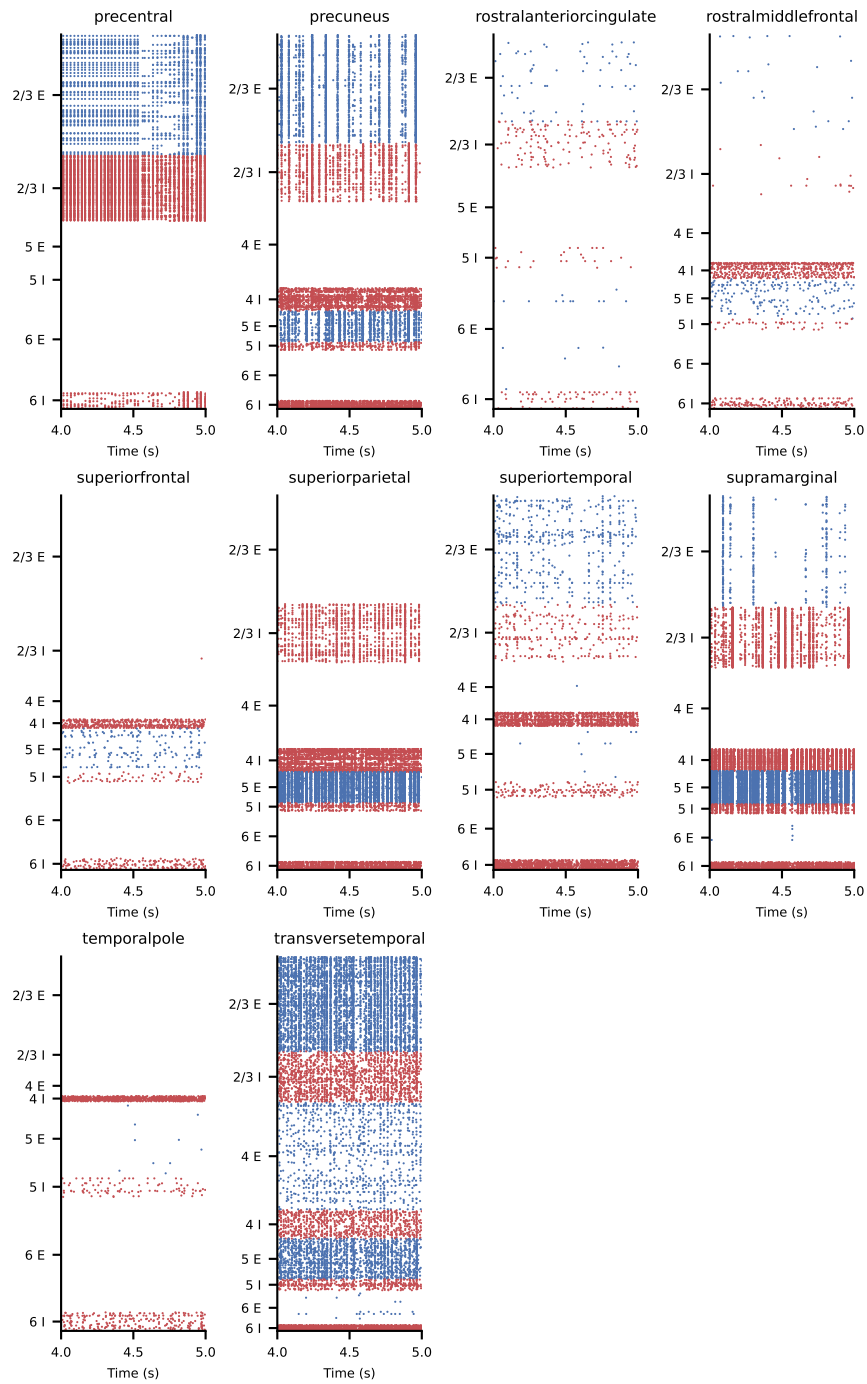

Fig. S13. Raster plots for the best-fit version. Subsampled to 2.5% of the excitatory (blue) and inhibitory (red) neurons.



## Appendix References

- Alonso-Nanclares L, Gonzalez-Soriano J, Rodriguez J, DeFelipe J. 2008. Gender differences in human cortical synaptic density. *Proc Natl Acad Sci USA*. *105*(38):14615–14619.
- Amit DJ, Brunel N. 1997. Model of global spontaneous activity and local structured activity during delay periods in the cerebral cortex. *Cereb Cortex*. *7*:237–252.
- Anderson JC, Martin KAC. 2009. The synaptic connections between cortical areas V1 and V2 in macaque monkey. *J Neurosci*. *29*(36):11283–11293.
- Axer M, Grässel D, Kleiner M, Dammers J, Dickscheid T, Reckfort J, Hütz T, Eiben B, Pietrzyk U, Zilles K, et al. 2011. High-resolution fiber tract reconstruction in the human brain by means of three-dimensional polarized light imaging. *Front Neuroinform*. *5*:34.
- Barbas H, Hilgetag CC, Saha S, Dermon CR, Suski JL. 2005. Parallel organization of contralateral and ipsilateral prefrontal cortical projections in the rhesus monkey. *BMC Neurosci*. *6*(1):32.
- Berg J, Sorensen SA, Ting JT, Miller JA, Chartrand T, Buchin A, Bakken TE, Budzillo A, Dee N, Ding SL, Gouwens NW, Hodge RD, Kalmbach B, Lee C, Lee BR, Alfiler L, Baker K, Barkan E, Beller A, Berry K, Bertagnolli D, Bickley K, Bomben J, Braun T, Brouner K, Casper T, Chong P, Crichton K, Dalley R, de Frates R, Desta T, Lee SD, D’Orazi F, Dotson N, Egdorf T, Enstrom R, Farrell C, Feng D, Fong O, Furdan S, Galakhova AA, Gamlin C, Gary A, Glandon A, Goldy J, Gorham M, Goriounova NA, Gratiy S, Graybuck L, Gu H, Hadley K, Hansen N, Heistek TS, Henry AM, Heyer DB, Hill D, Hill C, Hupp M, Jarsky T, Kebede S, Keene L, Kim L, Kim MH, Kroll M, Latimer C, Levi BP, Link KE, Mallory M, Mann R, Marshall D, Maxwell M, McGraw M, McMillen D, Melief E, Mertens EJ, Mezei L, Mihut N, Mok S, Molnar G, Mukora A, Ng L, Ngo K, Nicovich PR, Nyhus J, Olah G, Oldre A, Omstead V, Ozsvar A, Park D, Peng H, Pham T, Pom CA, Potekhina L, Rajanbabu R, Ransford S, Reid D, Rimorin C, Ruiz A, Sandman D, Sulc J, Sunkin SM, Szafer A, Szemenyei V, Thomsen ER, Tieu M, Torkelson A, Trinh J, Tung H, Wakeman W, Waleboer F, Ward K, Wilbers R, Williams G, Yao Z, Yoon JG, Anastassiou C, Arkhipov A, Barzo P, Bernard A, Cobbs C, de Witt Hamer PC, Ellenbogen RG, Esposito L, Ferreira M, Gwinn RP, Hawrylycz MJ, Hof PR, Idema S, Jones AR, Keene CD, Ko AL, Murphy GJ, Ng L, Ojemann JG, Patel AP, Phillips JW, Silbergeld DL, Smith K, Tasic B, Yuste R, Segev I, de Kock CPJ, Mansvelder HD, Tamas G, Zeng H, Koch C, Lein ES. 2021. Human neocortical expansion involves glutamatergic neuron diversification. *Nature*. *598*(7879):151–158.
- Binzegger T, Douglas RJ, Martin KAC. 2004. A quantitative map of the circuit of cat primary visual cortex. *J Neurosci*. *39*(24):8441–8453.
- Boldog E, Bakken TE, Hodge RD, Novotny M, Aevermann BD, Baka J, Bordé S, Close JL, Diez-Fuertes F, Ding SL, et al. 2018. Transcriptomic and morphophysiological evidence for a specialized human cortical GABAergic cell type. *Nat Neurosci*. *21*(9):1185–1195.
- Cano-Astorga N, DeFelipe J, Alonso-Nanclares L. 2021. Three-dimensional synaptic organization of layer III of the human temporal neocortex. *Cereb Cortex*. *31*(10):4742–4764.
- Chartrand T, Dalley R, Close J, Goriounova NA, Lee BR, Mann R, Miller JA, Molnar G, Mukora A, Alfiler L, Baker K, Bakken TE, Berg J, Bertagnolli D, Braun T, Brouner K, Casper T, Csajbok EA, Dee N, Egdorf T, Enstrom R, Galakhova AA, Gary A, Gelfand E, Goldy J, Hadley K, Heistek TS, Hill D, Jorstad N, Kim L, Kocsis AK, Kruse L, Kunst M, Leon G, Long B, Mallory M, McGraw M, McMillen D, Melief EJ, Mihut N, Ng L, Nyhus J, Oláh G, Ozsvár A, Omstead V, Peterfi Z, Pom A, Potekhina L, Rajanbabu R, Rozsa M, Ruiz A, Sandle J, Sunkin SM, Szots I, Tieu M, Toth M, Trinh J, Vargas S, Vumbaco D, Williams G, Wilson J, Yao Z, Barzo P, Cobbs C, Ellenbogen RG, Esposito L, Ferreira M, Gouwens NW, Grannan B, Gwinn RP, Hauptman JS, Jarsky T, Keene CD, Ko AL, Koch C, Ojemann JG, Patel A, Ruzevick J, Silbergeld DL, Smith K, Sorensen SA, Tasic B, Ting JT, Waters J, de Kock CP, Mansvelder HD, Tamas G, Zeng H, Kalmbach B, Lein ES. 2023. Morphoelectric and transcriptomic divergence of the layer 1 interneuron repertoire in human versus mouse neocortex. *Science*. *382*(6667).
- Colby C, Gattass R, Olson C, Gross C. 1988. Topographical organization of cortical afferents to extrastriate visual area PO in the macaque: a dual tracer study. *J Comp Neurol*. *269*(3):392–413.
- Collins CE, Airey DC, Young NA, Leitch DB, Kaas JH. 2010. Neuron densities vary across and within cortical areas in primates. *Proc Natl Acad Sci USA*. *107*(36):15927–15932.
- Cragg B. 1967. The density of synapses and neurones in the motor and visual areas of the cerebral cortex. *J Anat*. *101*(4):639–654.
- DeFelipe J, Alonso-Nanclares L, Arellano J. 2002. Microstructure of the neocortex: comparative aspects. *J Neurocytol*. *31*:299–316.
- Dehay C, Kennedy H, Bullier J, Berland M. 1988. Absence of interhemispheric connections of area 17 during development in the monkey. *Nature*. *331*(6154):348–350.
- Douglas RJ, Martin KAC. 2004. Neuronal circuits of the neocortex. *Annu Rev Neurosci*. *27*:419–451.
- Douglas RJ, Martin KAC, Whitteridge D. 1989. A canonical microcircuit for neocortex. *Neural Comput*. *1*(4):480–488.
- Fabri M, Manzoni T. 1996. Glutamate decarboxylase immunoreactivity in corticocortical projecting neurons of rat somatic sensory cortex. *Neuroscience*. *72*(2):435–448.
- Fabri M, Manzoni T. 2004. Glutamic acid decarboxylase immunoreactivity in callosal projecting neurons of cat and rat somatic sensory areas. *Neuroscience*. *123*(2):557–566.
- Fourcaud N, Brunel N. 2002. Dynamics of the firing probability of noisy integrate-and-fire neurons. *Neural Comput*. *14*:2057–2110.
- Gabbott PL, Somogyi P. 1986. Quantitative distribution of GABA-immunoreactive neurons in the visual cortex (area 17) of the cat. *Exp Brain Res*. *61*(2):323–331.
- Galuske R, Schlote W, Bratzke H, Singer W. 2000. Interhemispheric asymmetries of the modular structure in human temporal cortex. *Science*. *5486*(289):1946–1949.
- Gattass R, Sousa A, Mishkin M, Ungerleider L. 1997. Cortical projections of area V2 in the macaque. *Cereb Cortex*. *7*(2):110–129.
- Girard P, Hupé JM, Bullier J. 2001. Feedforward and feedback connections between areas v1 and v2 of the monkey have similar rapid conduction velocities. *J Neurophysiol*. *85*(3):1328–1331.
- Gonchar Y, Johnson P, Weinberg R. 1995. GABA-immunopositive neurons in rat neocortex with contralateral projections to SI. *Brain Res*. *697*(1):27–34.
- Goulas A, Werner R, Beul SF, Säring D, Heuvel Mvd, Triarhou LC, Hilgetag CC. 2016. Cytoarchitectonic similarity is a wiring principle of the human connectome. *BioRxiv*.

- Gouwens NW, Sorensen SA, Berg J, Lee C, Jarsky T, Ting J, Sunkin SM, Feng D, Anastassiou CA, Barkan E, et al. 2019. Classification of electrophysiological and morphological neuron types in the mouse visual cortex. *Nat Neurosci.* 22:1182–1195.
- Harrison KH, Hof PR, Wang SH. 2002. Scaling laws in the mammalian neocortex: Does form provide clues to function? *J Neurocytol.* 31:289–298.
- Herculano-Houzel S. 2009. The human brain in numbers: a linearly scaled-up primate brain. *Front Hum Neurosci.* 3:31.
- Herculano-Houzel S, Mota B, Wong P, Kaas JH. 2010. Connectivity-driven white matter scaling and folding in primate cerebral cortex. *Proc Natl Acad Sci USA.* 107(44):19008–19013.
- Higo S, Udaka N, Tamamaki N. 2007. Long-range GABAergic projection neurons in the cat neocortex. *J Comp Neurol.* 503(3):421–431.
- Hodge RD, Bakken TE, Miller JA, Smith KA, Barkan ER, Graybiel LT, Close JL, Long B, Johansen N, Penn O, Yao Z, Eggermont J, Höllt T, Levi BP, Shehata SI, Aevermann B, Beller A, Bertagnolli D, Brouner K, Casper T, Cobbs C, Dalley R, Dee N, Ding SL, Ellenbogen RG, Fong O, Garren E, Goldy J, Gwinn RP, Hirschstein D, Keene CD, Keshk M, Ko AL, Lathia K, Mahfouz A, Maltzer Z, McGraw M, Nguyen TN, Nyhus J, Ojemann JG, Oldre A, Parry S, Reynolds S, Rimorin C, Shapovalova NV, Somasundaram S, Szafer A, Thomsen ER, Tieu M, Quon G, Scheuermann RH, Yuste R, Sunkin SM, Lelieveldt B, Feng D, Ng L, Bernard A, Hawrylycz M, Phillips JW, Tasic B, Zeng H, Jones AR, Christof K, Lein ES. 2019. Conserved cell types with divergent features in human versus mouse cortex. *Nature.* 573(7772):61–68.
- Jiang HJ, Qi G, Duarte R, Feldmeyer D, van Albada SJ. 2023. A layered microcircuit model of somatosensory cortex with three interneuron types and cell-type-specific short-term plasticity. *BioRxiv.*:2023–10.
- Jorstad NL, Close J, Johansen N, Yanny AM, Barkan ER, Travaglini KJ, Bertagnolli D, Campos J, Casper T, Crichton K, et al. 2023. Transcriptomic cytoarchitecture reveals principles of human neocortex organization. *Science.* 382(6667):eadf6812.
- Maksimov A, Diesmann M, van Albada SJ. 2018. Criteria on balance, stability, and excitability in cortical networks for constraining computational models. *Front Comput Neurosci.* 12:44.
- Markov NT, Ercsey-Ravasz MM, Ribeiro Gomes AR, Lamy C, Magrou L, Vezoli J, Misery P, Falchier A, Quilodran R, Gariel MA, Sallet J, Gamanut R, Huissoud C, Clavagnier S, Giroud P, Sappey-Marinié D, Barone P, Dehay C, Toroczkai Z, Knoblauch K, Van Essen DC, Kennedy H. 2014a. A weighted and directed interareal connectivity matrix for macaque cerebral cortex. *Cereb Cortex.* 24(1):17–36.
- Markov NT, Misery P, Falchier A, Lamy C, Vezoli J, Quilodran R, Gariel MA, Giroud P, Ercsey-Ravasz M, Pilaz LJ, Huissoud C, Barone P, Dehay C, Toroczkai Z, Van Essen DC, Kennedy H, Knoblauch K. 2011. Weight consistency specifies regularities of macaque cortical networks. *Cereb Cortex.* 21(6):1254–1272.
- Markov NT, Vezoli J, Chameau P, Falchier A, Quilodran R, Huissoud C, Lamy C, Misery P, Giroud P, Ullman S, Barone P, Dehay C, Knoblauch K, Kennedy H. 2014b. Anatomy of hierarchy: Feedforward and feedback pathways in macaque visual cortex. *J Comp Neurol.* 522(1):225–259.
- Markram H, Muller E, Ramaswamy S, Reimann MW, Abdellah M, Sanchez CA, Ailamaki A, Alonso-Nanclares L, Antille N, Arsever S, Kahou GAA, Berger TK, Bilgili A, Buncic N, Chalimourda A, Chindemi G, Courcol JD, Delalondre F, Delattre V, Druckmann S, Dumusc R, Dynes J, Eilemann S, Gal E, Gevaert ME, Ghobril JP, Gidon A, Graham JW, Gupta A, Haenel V, Hay E, Heinis T, Hernando JB, Hines M, Kanari L, Keller D, Kenyon J, Khazen G, Kim Y, King JG, Kisvarday Z, Kumbhar P, Lasserre S, Bé JVL, Magalhães BR, Merchán-Pérez A, Meystre J, Morrice BR, Muller J, Muñoz-Céspedes A, Muralidhar S, Muthurasa K, Nachbaur D, Newton TH, Nolte M, Ovcharenko A, Palacios J, Pastor L, Perin R, Ranjan R, Riachi I, Rodríguez JR, Riquelme JL, Rössert C, Sfyarakis K, Shi Y, Shillcock JC, Silberberg G, Silva R, Tauheed F, Telefont M, Toledo-Rodriguez M, Tränkler T, Geit WV, Díaz JV, Walker R, Wang Y, Zaninetta SM, DeFelipe J, Hill SL, Segev I, Schürmann F. 2015. Reconstruction and simulation of neocortical microcircuitry. *Cell.* 163(2):456–492.
- McDonald CT, Burkhalter A. 1993. Organisation of long-range inhibitory connections within rat visual cortex. *J Neurosci.* 13(2):768–781.
- Miller DJ, Bhaduri A, Sestan N, Kriegstein A. 2019. Shared and derived features of cellular diversity in the human cerebral cortex. *Curr Opin Neurobiol.* 56:117–124.
- Minxha J, Adolphs R, Fusi S, Mamelak AN, Rutishauser U. 2020. Flexible recruitment of memory-based choice representations by the human medial frontal cortex. *Science.* 368(6498):eaba3313.
- Mohan H, Verhoog MB, Doreswamy KK, Eyal G, Aardse R, Lodder BN, Goriounova NA, Asamoah B, Brakspear AC, Groot C, van der Sluis S, Testa-Silva G, Obermayer J, Boudewijns ZS, Narayanan RT, Baayen JC, Segev I, Mansvelde HD, de Kock CP. 2015. Dendritic and axonal architecture of individual pyramidal neurons across layers of adult human neocortex. *Cereb Cortex.* 25(12):4839–4853.
- Mohan H, Verhoog MB, Doreswamy KK, Eyal G, Aardse R, Lodder BN, Goriounova NA, Asamoah B, Brakspear AC, Groot C, Van Der Sluis S, Testa-Silva G, Obermayer J, Boudewijns ZS, Narayanan RT, Baayen JC, Segev I, Mansvelde HD, De Kock CP. 2023. Morphological data of human neocortical pyramidal neurons (v1.1) (v1.1).
- O’Kusky J, Colonnier M. 1982. A laminar analysis of the number of neurons, glia, and synapses in the visual cortex (area 17) of adult macaque monkeys. *J Comp Neurol.* 210(3):278–290.
- Packer AM, Yuste R. 2011. Dense, unspecific connectivity of neocortical parvalbumin-positive interneurons: A canonical microcircuit for inhibition? *J Neurosci.* 31(37):13260–13271.
- Perin R, Berger TK, Markram H. 2011. A synaptic organizing principle for cortical neuronal groups. *Proc Natl Acad Sci USA.* 108(13):5419–5424.
- Pinto A, Fuentes C, Paré D. 2006. Feedforward inhibition regulates perirhinal transmission of neocortical inputs to the entorhinal cortex: ultrastructural study in guinea pigs. *J Comp Neurol.* 495(6):722–734.
- Potjans TC, Diesmann M. 2014. The cell-type specific cortical microcircuit: Relating structure and activity in a full-scale spiking network model. *Cereb Cortex.* 24(3):785–806.
- Reimann MW, Horlemann AL, Ramaswamy S, Muller EB, Markram H. 2017. Morphological diversity strongly constrains synaptic connectivity and plasticity. *Cereb Cortex.* 27(9):4570–4585.



- Rosen BQ, Halgren E. 2022. An estimation of the absolute number of axons indicates that human cortical areas are sparsely connected. *PLOS Biol.* *20*(3):e3001575.
- Ruddy KL, Leemans A, Carson RG. 2017. Transcallosal connectivity of the human cortical motor network. *Brain Struct Funct.* *222*:1243–1252.
- Salin P, Bullier J, Kennedy H. 1989. Convergence and divergence in the afferent projections to cat area 17. *J Comp Neurol.* *283*(4):486–512.
- Schmidt M, Bakker R, Hilgetag CC, Diesmann M, van Albada SJ. 2018. Multi-scale account of the network structure of macaque visual cortex. *Brain Struct Funct.* *223*(3):1409–1435.
- Schuman B, Dellal S, Prönneke A, Machold R, Rudy B. 2021. Neocortical layer 1: An elegant solution to top-down and bottom-up integration. *Annual Review of Neuroscience.* *44*(1):221–252.
- Seehaus AK, Roebroek A, Chiry O, Kim DS, Ronen I, Bratzke H, Goebel R, Galuske RA. 2013. Histological validation of DW-MRI tractography in human postmortem tissue. *Cereb Cortex.* *23*(2):442–450.
- Senk J, Hagen E, van Albada SJ, Diesmann M. 2023. Reconciliation of weak pairwise spike-train correlations and highly coherent local field potentials across space. *ArXiv:1805.10235v1 [q-bio.NC]*.
- Shapson-Coe A, Januszewski M, Berger DR, Pope A, Wu Y, Blakely T, Schalek RL, Li PH, Wang S, Maitin-Shepard J, et al. 2024. A petavoxel fragment of human cerebral cortex reconstructed at nanoscale resolution. *Science.* *384*(6696):eadk4858.
- Sherwood CC, Miller SB, Karl M, Stimpson CD, Phillips KA, Jacobs B, Hof PR, Raghanti MA, Smaers JB. 2020. Invariant synapse density and neuronal connectivity scaling in primate neocortical evolution. *Cereb Cortex.* *30*(10):5604–5615.
- Stephan K, Kamper L, Bozkurt A, Burns G, Young M, Kötter R. 2001. Advanced database methodology for the collation of connectivity data on the macaque brain (CoCoMac). *Philos Trans R Soc B.* *356*:1159–1186.
- Swindale NV, Spacek MA, Krause M, Mitelut C. 2023. Spontaneous activity in cortical neurons is stereotyped and non-poisson. *Cereb Cortex.* *33*(11):6508–6525.
- Tardif E, Clarke S. 2001. Intrinsic connectivity of human auditory areas: a tracing study with DiI. *Eur J Neurosci.* *13*(5):1045–1050.
- Teeter C, Iyer R, Menon V, Gouwens N, Feng D, Berg J, Szafer A, Cain N, Zeng H, Hawrylycz M, Koch C, Mihalas S. 2018. Generalized leaky integrate-and-fire models classify multiple neuron types. *Nat Commun.* *9*:709.
- Tomioka R, Okamoto K, Furuta T, Fujiyama F, Iwasato T, Yanagawa Y, Obata K, Kaneko T, Tamamaki N. 2005. Demonstration of long-range GABAergic connections distributed throughout the mouse neocortex. *Eur J Neurosci.* *21*:1587–1600.
- Tomioka R, Rockland KS. 2007. Long-distance corticocortical GABAergic neurons in the adult monkey white and gray matter. *J Comp Neurol.* *505*(5):526–538.
- Urrutia-Piñones J, Morales-Moraga C, Sanguinetti-González N, Escobar AP, Chiu CQ. 2022. Long-range GABAergic projections of cortical origin in brain function. *Front Syst Neurosci.* *16*:841869.
- Van Essen DC, Smith SM, Barch DM, Behrens TE, Yacoub E, Ugurbil K, Consortium WMH, et al. 2013. The wu-minn human connectome project: An overview. *Neuroimage.* *80*:62–79.
- Vandeveld I, Duckworth E, Reep R. 1996. Layer VII and the gray matter trajectories of corticocortical axons in rats. *Anatomy and Embryology.* *194*:581–593.
- Von Economo C. 2009. *Cellular Structure of the Human Cerebral Cortex*. Karger Medical and Scientific Publishers. Translated and edited by L.C. Triarhou.
- Wagstyl K, Larocque S, Cucurull G, Lepage C, Cohen JP, Bludau S, Palomero-Gallagher N, Lewis LB, Funck T, Spitzer H, et al. 2020. Bigbrain 3D atlas of cortical layers: Cortical and laminar thickness gradients diverge in sensory and motor cortices. *PLOS Biol.* *18*(4):e3000678.
- Winnubst J, Bas E, Ferreira TA, Wu Z, Economo MN, Edson P, Arthur BJ, Bruns C, Rokicki K, Schauder D, et al. 2019. Reconstruction of 1,000 projection neurons reveals new cell types and organization of long-range connectivity in the mouse brain. *Cell.* *179*(1):268–281.
